# Supplementary material for: Recombinase-independent chromosomal rearrangements between dispersed inverted repeats in Saccharomyces cerevisiae meiosis
Source: PubMed Central journal article supplement (PMC10570019; doi:10.1093/nar/gkad650), 2023-08-07
Supplement: gkad650_supplemental_file.pdf [file gkad650_supplemental_file.pdf]

Supplemental Figure 1: Ectopic recombinants 1 and 3 are dependent upon *leu2::hisG*

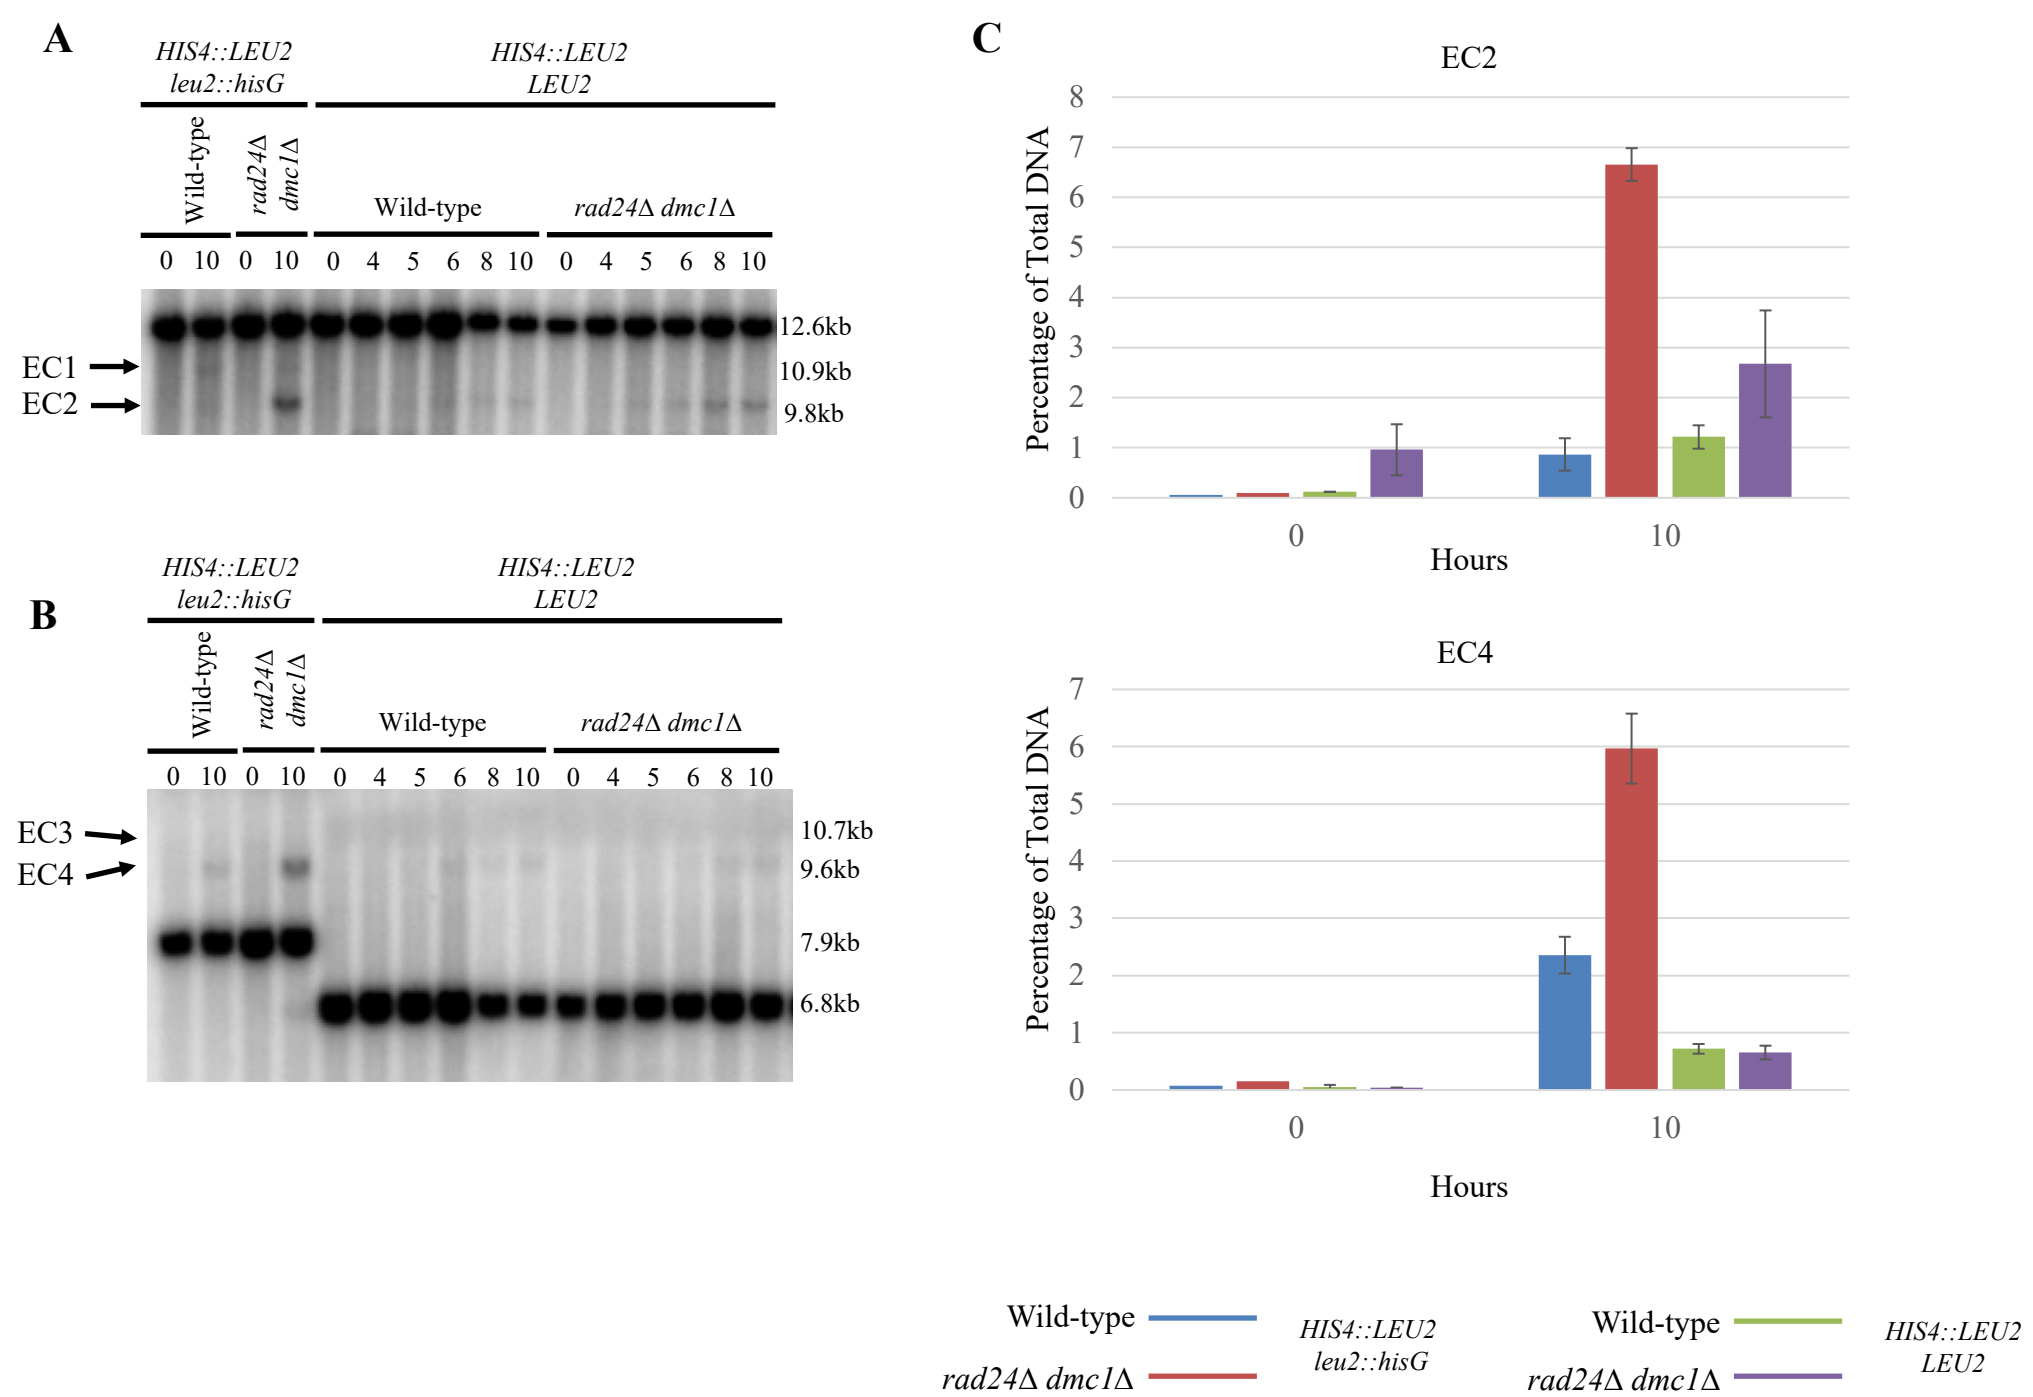

**Supplemental Figure 1: Ectopic recombinants 1 and 3 are dependent upon *leu2::hisG*.** (A) Southern blot using *HIS4 LH* probe (probe A) and (B) *LEU2* probe (probe B) showing ectopic recombinants (arrows). (C) Quantification of ectopic recombinant levels from (A) and (B) with average ectopic recombinants signal plotted with standard deviation.

Supplemental Figure 2: Ectopic recombinants can form between *HIS4::LEU2* and *nuc1::LEU2*

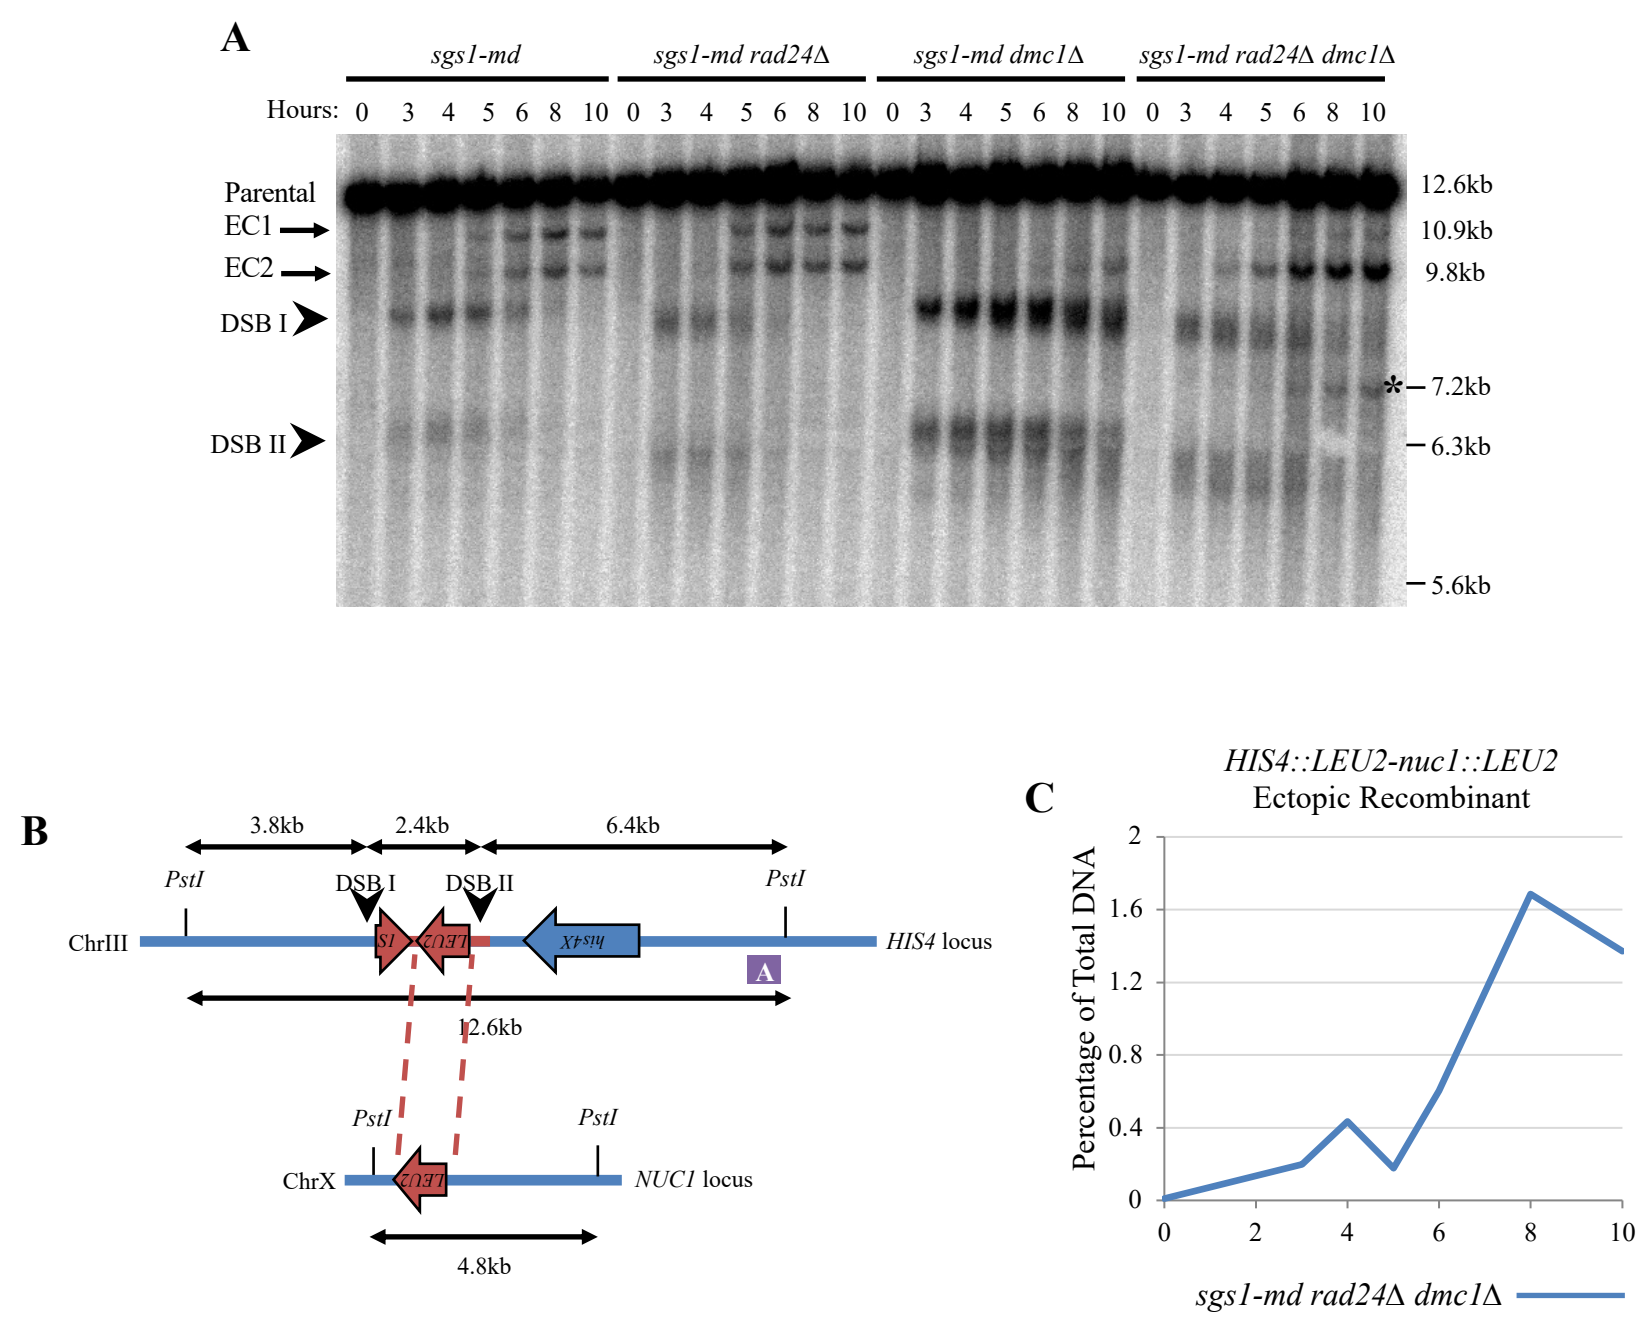

**Supplemental Figure 2: Ectopic recombinants can form between *HIS4::LEU2* and *nuc1::LEU2*.** (A) Southern blot shown in figure 2 using *HIS4 LH* probe (probe A, purple box), with DSBs and ectopic recombinants. Asterisk indicates additional ectopic recombinant product. (B) Schematic of the *HIS4::LEU2* hotspot on chromosome III (top) and the *NUC1::LEU2* locus on chromosome X (bottom). Dotted lines indicate homology. (C) Quantification of ectopic recombinant shown in (A).

## Supplemental Table 1: Summary of mutant phenotypes

| Genotype                    | Phenotype | Recombinant Types  | Average Total Ectopic Recombinants (10 hours) | DSB Resection       | Checkpoint Function | Inter-homologue Bias | Ectopic Repair Pathways                  |
|-----------------------------|-----------|--------------------|-----------------------------------------------|---------------------|---------------------|----------------------|------------------------------------------|
| Wild-type                   |           | EC1, EC2, EC3, EC4 | 5.48%                                         | Normal              | Active              | Active               | HR, RD-SSA, RI-SSA, RD-BIR, RI-BIR       |
| <i>rad24Δ</i>               |           | EC1, EC2, EC3, EC4 | 9.69%                                         | Hyper-resected      | Absent              | Defective            | HR, RD-SSA, RI-SSA, RD-BIR, RI-BIR       |
| <i>dmc1Δ</i>                |           | EC2, EC4           | 1.96%                                         | Continued Resection | Arrested            | Active               | (HR), (RD-SSA), (RD-BIR), RI-SSA, RI-BIR |
| <i>rad24Δ dmc1Δ</i>         |           | EC2, EC4           | 13.1%                                         | Hyper-resected      | Absent              | Defective            | (HR), (RD-SSA), (RD-BIR), RI-SSA, RI-BIR |
| <i>sgs1-md</i>              |           | EC1, EC2, EC3, EC4 | 17.11%                                        | Normal              | Active              | Defective            | HR, RD-SSA, RI-SSA, RD-BIR, RI-BIR       |
| <i>sgs1-md rad24Δ</i>       |           | EC1, EC2, EC3, EC4 | 21.24%                                        | Hyper-resected      | Absent              | Defective            | HR, RD-SSA, RI-SSA, RD-BIR, RI-BIR       |
| <i>sgs1-md dmc1Δ</i>        |           | EC2, EC4           | 5.78%                                         | Continued Resection | Arrested            | Defective            | (HR), (RD-SSA), (RD-BIR), RI-SSA, RI-BIR |
| <i>sgs1-md rad24Δ dmc1Δ</i> |           | (EC1), EC2, EC4    | 16.22%                                        | Hyper-resected      | Absent              | Defective            | (HR), (RD-SSA), (RD-BIR), RI-SSA, RI-BIR |
| <i>rad51Δ dmc1Δ</i>         |           | EC2, EC4           | 9.04%                                         | Continued Resection | Arrested            | Active               | RI-SSA, RI-BIR                           |
| <i>rad24Δ rad51Δ dmc1Δ</i>  |           | EC2, EC4           | 8.01%                                         | Hyper-resected      | Absent              | Defective            | RI-SSA, RI-BIR                           |

**Supplemental Table 1: Summary of Mutant Phenotypes:** Genotypes of strains investigated in this study with predominant ectopic recombinant types observed. Average ectopic recombinant levels from figures 1, 2 and 5 at 10 hours. Resection phenotypes as described in (36,37,40,41). Checkpoint function as described from (36,37). Inter-homologue bias as described in this study and (18,24). Potential ectopic recombinant repair pathways with brackets indicating unknown function.

**Supplemental Table 2: Genotypes of strains used in this study**

| <b>Strain</b>                           | <b>Number</b> | <b>Genotype</b>                                                                                                                                                                                                           |
|-----------------------------------------|---------------|---------------------------------------------------------------------------------------------------------------------------------------------------------------------------------------------------------------------------|
| wildtype                                | MJ6           | <i>ho::LYS2'</i> , <i>lys2'</i> , <i>ura3'</i> , <i>arg4-nsp'</i> , <i>leu2::hisG'</i> , <i>his4X::LEU2'</i> , <i>nuc1::LEU2'</i>                                                                                         |
| <i>sae2Δ</i>                            | MJ315         | <i>ho::LYS2'</i> , <i>lys2'</i> , <i>ura3'</i> , <i>arg4-nsp'</i> , <i>leu2::hisG'</i> , <i>his4X::LEU2'</i> , <i>nuc1::LEU2'</i> , <i>sae2Δ::KanMX'</i>                                                                  |
| <i>rad24Δ</i>                           | SG150         | <i>ho::LYS2'</i> , <i>lys2'</i> , <i>ura3'</i> , <i>arg4-nsp'</i> , <i>leu2::hisG'</i> , <i>his4X::LEU2'</i> , <i>nuc1::LEU2'</i> , <i>rad24Δ::hpHMX4'</i>                                                                |
| <i>dmc1Δ</i>                            | SG147         | <i>ho::LYS2'</i> , <i>lys2'</i> , <i>ura3'</i> , <i>arg4-nsp'</i> , <i>leu2::hisG'</i> , <i>his4X::LEU2'</i> , <i>nuc1::LEU2'</i> , <i>dmc1Δ::LEU2'</i>                                                                   |
| <i>rad24Δ dmc1Δ</i>                     | SG146         | <i>ho::LYS2'</i> , <i>lys2'</i> , <i>ura3'</i> , <i>arg4-nsp'</i> , <i>leu2::hisG'</i> , <i>his4X::LEU2'</i> , <i>nuc1::LEU2'</i> , <i>dmc1Δ::LEU2'</i> , <i>rad24Δ::hpHMX4'</i>                                          |
| wildtype                                | MJ1395        | <i>ho::LYS2'</i> , <i>lys2'</i> , <i>ura3'</i> , <i>arg4-nsp'</i> , <i>his4X::LEU2'</i>                                                                                                                                   |
| <i>rad24Δ dmc1Δ</i>                     | MJ1398        | <i>ho::LYS2'</i> , <i>lys2'</i> , <i>ura3'</i> , <i>arg4-nsp'</i> , <i>his4X::LEU2'</i> , <i>dmc1Δ::LEU2'</i> , <i>rad24Δ::hpHMX4'</i>                                                                                    |
| <i>sgs1-md</i>                          | SG193         | <i>ho::LYS2'</i> , <i>lys2'</i> , <i>ura3'</i> , <i>arg4-nsp-?'</i> , <i>leu2::hisG'</i> , <i>his4X::LEU2'</i> , <i>nuc1::LEU2'</i> , <i>natMX::pCLB2::3HA::SGS1'</i>                                                     |
| <i>sgs1-md rad24Δ</i>                   | SG153         | <i>ho::LYS2'</i> , <i>lys2'</i> , <i>ura3'</i> , <i>arg4-nsp-?'</i> , <i>leu2::hisG'</i> , <i>his4X::LEU2'</i> , <i>nuc1::LEU2'</i> , <i>rad24Δ::hpHMX4'</i> , <i>natMX::pCLB2::3HA::SGS1'</i>                            |
| <i>sgs1-md dmc1Δ</i>                    | SG547         | <i>ho::LYS2'</i> , <i>lys2'</i> , <i>ura3'</i> , <i>arg4-nsp'</i> , <i>leu2::hisG'</i> , <i>his4X::LEU2'</i> , <i>nuc1::LEU2'</i> , <i>natMX::pCLB2::3HA::SGS1'</i> , <i>dmc1Δ::LEU2'</i>                                 |
| <i>sgs1-md rad24Δ dmc1Δ</i>             | SG223         | <i>ho::LYS2'</i> , <i>lys2'</i> , <i>ura3'</i> , <i>arg4-nsp-?'</i> , <i>leu2::hisG'</i> , <i>his4X::LEU2'</i> , <i>nuc1::LEU2'</i> , <i>dmc1Δ::LEU2'</i> , <i>rad24Δ::hpHMX4'</i> , <i>natMX::pCLB2::3HA::SGS1'</i>      |
| <i>rad51Δ dmc1Δ</i>                     | SG271         | <i>ho::LYS2'</i> , <i>lys2'</i> , <i>ura3'</i> , <i>arg4-?'</i> , <i>leu2::hisG'</i> , <i>his4X::LEU2'</i> , <i>nuc1::LEU2'</i> , <i>rad51Δ::hisG-URA3-hisG'</i> , <i>dmc1Δ::HphMX'</i>                                   |
| <i>rad24Δ rad51Δ dmc1Δ</i>              | SG243         | <i>ho::hisG'</i> , <i>lys2'</i> , <i>ura3'</i> , <i>arg4-nsp'</i> , <i>leu2::hisG'</i> , <i>his4X::LEU2'</i> , <i>nuc1::LEU2'</i> , <i>dmc1Δ::LEU2'</i> , <i>rad24Δ::hpHMX4'</i> , <i>rad51Δ::hisG-URA3-hisG'</i>         |
| <i>PRD1::pMN164/PRD1</i>                | MJ1140        | <i>ho::LYS2'</i> , <i>lys2'</i> , <i>ura3'</i> , <i>arg4-nsp'</i> , <i>leu2::hisG'</i> , <i>his4X::LEU2'</i> , <i>nuc1::LEU2'</i> , <i>PRD1::pMN164-URA3/PRD1</i>                                                         |
| <i>PRD1::pMN164/PRD1 rad24Δ</i>         | MJ1143        | <i>ho::LYS2'</i> , <i>lys2'</i> , <i>ura3'</i> , <i>arg4-nsp'</i> , <i>leu2::hisG'</i> , <i>his4X::LEU2'</i> , <i>nuc1::LEU2'</i> , <i>PRD1::pMN164-URA3/PRD1</i> , <i>rad24Δ::Hyg'</i>                                   |
| <i>PRD1::pMN164/PRD1 sgs1-md</i>        | MJ1146        | <i>ho::LYS2'</i> , <i>lys2'</i> , <i>ura3'</i> , <i>arg4-nsp'</i> , <i>leu2::hisG'</i> , <i>his4X::LEU2'</i> , <i>nuc1::LEU2'</i> , <i>PRD1::pMN164-URA3/PRD1</i> , <i>natMX::pCLB2::3HA::SGS1'</i>                       |
| <i>PRD1::pMN164/PRD1 sgs1-md rad24Δ</i> | MJ1149        | <i>ho::LYS2'</i> , <i>lys2'</i> , <i>ura3'</i> , <i>arg4-nsp'</i> , <i>leu2::hisG'</i> , <i>his4X::LEU2'</i> , <i>nuc1::LEU2'</i> , <i>PRD1::pMN164-URA3/PRD1</i> , <i>rad24Δ::Hyg'</i> , <i>natMX::pCLB2::3HA::SGS1'</i> |
